# Supplementary material
Source: MDPI journal article supplement (https://www.mdpi.com/2075-163X/8/10/454)
Supplement: s1 [file s1]

## Supplementary Materials

# A Geometallurgical Approach to Tailings Management: An Example from the Savage River Fe-ore Mine, Western Tasmania

Anita Parbhakar-Fox <sup>1,\*</sup>, John Glen <sup>2</sup> and Bonita Raimondo <sup>2</sup>

<sup>1</sup> ARC Transforming the Mining Value Chain Research Hub, Private Bag 79, Sandy Bay, Tasmania, 7005, Australia

<sup>2</sup> ALS-Metallurgy, 39 River Road, Wivenhoe, Tasmania, 7320, Australia; john.glen@alsglobal.com(J.G.); bonita.raimondo@alsglobal.com (B.R.)

\* Correspondence: anitap1@utas.edu.au; Tel.: +61 0400850831

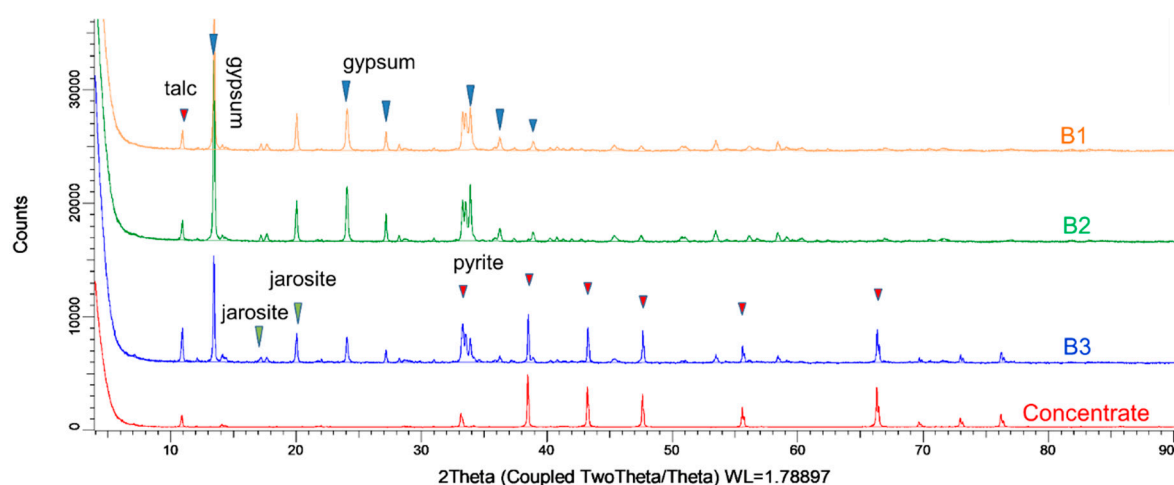

**Figure S1.** X-ray diffractometry patterns for the concentrate and solids taken from B1, B2 and B3 tanks at the end of the experiment.

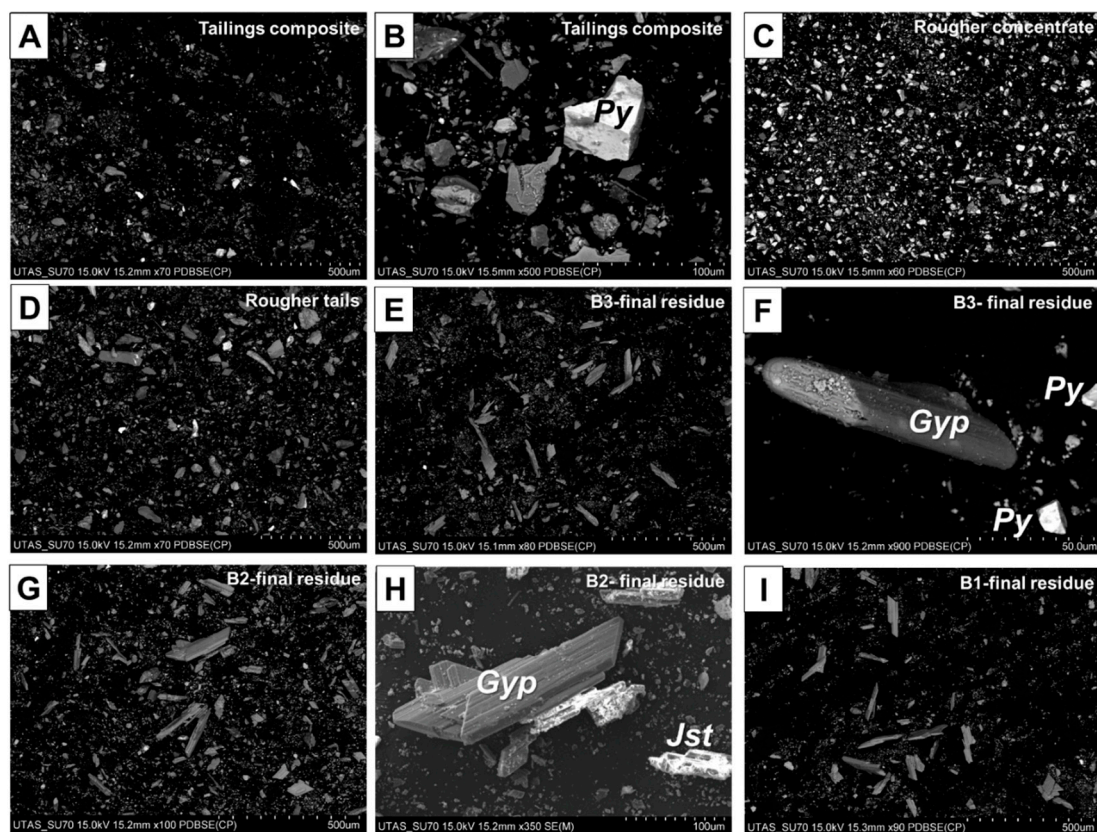

**Figure S2.** Back scattered electron (BSE) images of solid residues from the tailings composite, rougher concentrate and each tank. (A) Tailings composite material comprising bulk materials collected from Zones 1-4; (B) Pyrite contained in the tailings composite; (C) Rougher concentrate produced after tailings flotation; (D) New tailings stream produced after flotation; (E) Final bioleached residue from tank B3 (i.e., least oxidised) ; (F) Gypsum contained in the tank B3 residue; (G) Final residue from tank B2; (H) Gypsum contained in tank B2; (I) Final bioleached materials from the most oxidized bioleached tank confirming the majority of pyrite had been oxidized (abbreviations: Gyp, gypsum; Jst, jarosite, Py, pyrite).
